# Supplementary material for: Unraveling genomic features and phylogenomics through the analysis of three Mexican endemic Myotis genomes
Source: PeerJ. 2024 Jul 8;12:e17651. doi: 10.7717/peerj.17651 (PMC11238727; doi:10.7717/peerj.17651)
Supplement: Supplemental Information 2 [file peerj-12-17651-s002.xlsx]

## Sheet: Hoja1
Order	Suborder	Family	Species	Accession Number	Repository	Author
Primates	Haplorrhini	Hominidae	Homo sapiens	GRCh38.p13, version 102.38	ENSEMBL	Yates et al. 2020
Rodentia	Myomorpha	Muridae	Mus musculus	GCF_000001635.27	NCBI database	Genome Reference Consortium
Chiroptera	Yangochiroptera	Phyllostomidae	Artibeus jamaicensis	GCF_014825515.1	NCBI database	College of Life Sciences at Wuhan University
Chiroptera	Yangochiroptera	Phyllostomidae	Carollia perspicillata	GCA_004027735.1	NCBI database	Broad Institute
Chiroptera	Yangochiroptera	Phyllostomidae	Desmodus rotundus	GCA_002940915.2	NCBI database	Zepeda et al. 2018
Chiroptera	Yangochiroptera	Vespertilionidae	Eptesicus fuscus	GCF_000308155.1	NCBI database	Broad Institute
Chiroptera	Yangochiroptera	Phyllostomidae	Glossophaga soricina	PRJNA873372	NCBI database	Pontificia Universidad Catolica del Ecuador
Chiroptera	Yangochiroptera	Vespertilionidae	Lasiurus borealis	GCA_004026805.1	NCBI database	Broad Institute
Chiroptera	Yangochiroptera	Phyllostomidae	Macrotus californicus	GCA_007922815.1	NCBI database	Broad Institute
Chiroptera	Yangochiroptera	Phyllostomidae	Micronycteris hirsuta	GCA_004026765.1	NCBI database	Broad Institute
Chiroptera	Yangochiroptera	Vespertilionidae	Miniopterus natalensis	GCA_001595765.1	NCBI database	University of California, San Francisco
Chiroptera	Yangochiroptera	Vespertilionidae	Miniopterus schreibersii	GCA_004026525.1	NCBI database	Broad Institute
Chiroptera	Yangochiroptera	Molossidae	Molossus molossus	GCA_014108415.1	NCBI database	Jebb et al. 2020
Chiroptera	Yangochiroptera	Vespertilionidae	Mormoops blainvillei	GCA_004026545.1	NCBI database	Broad Institute
Chiroptera	Yangochiroptera	Vespertilionidae	Murina feae	GCA_004026665.1	NCBI database	Broad Institute
Chiroptera	Yangochiroptera	Vespertilionidae	Myotis brandtii	GCA_000412655.1	NCBI database	Seim et al. 2013
Chiroptera	Yangochiroptera	Vespertilionidae	Myotis davidii	GCF_000327345.1	NCBI database	Zhang et al. 2013
Chiroptera	Yangochiroptera	Vespertilionidae	Myotis findleyi	SAMN37985987: JAWQEE000000000	NCBI database	this study
Chiroptera	Yangochiroptera	Vespertilionidae	Myotis lucifugus	GCA_000147115.1	NCBI database	Broad Institute
Chiroptera	Yangochiroptera	Vespertilionidae	Myotis Myotis	GCA_014108235.1	NCBI database	Jebb et al. 2020
Chiroptera	Yangochiroptera	Vespertilionidae	Myotis planiceps	SAMN37987054: JAYKON000000000	NCBI database	this study
Chiroptera	Yangochiroptera	Vespertilionidae	Myotis vivesi	SAMN37984258: JAWPEG000000000	NCBI database	this study
Chiroptera	Yangochiroptera	Noctilonidae	Noctilio leporinus	GCA_004026585.1	NCBI database	Broad Institute
Chiroptera	Yangochiroptera	Phyllostomidae	Phyllostomus discolor	GCA_004126475.3	NCBI database	Jebb et al. 2020
Chiroptera	Yangochiroptera	Phyllostomidae	Phyllostomus hastatus	GCA_019186645.2	NCBI database	Moreno-Santillan et al. 2021
Chiroptera	Yangochiroptera	Vespertilionidae	Pipistrellus kuhlii	GCA_014108245.1	NCBI database	Jebb et al. 2020
Chiroptera	Yangochiroptera	Vespertilionidae	Pipistrellus pipistrellus	GCA_004026625.1	NCBI database	Broad Institute
Chiroptera	Yangochiroptera	Phyllostomidae	Sturnira hondurensis	GCA_014824575.3	NCBI database	College of Life Sciences at Wuhan University
Chiroptera	Yangochiroptera	Molossidae	Tadarida brasiliensis	GCA_004025005.1	NCBI database	Broad Institute
Chiroptera	Yangochiroptera	Phyllostomidae	Tonatia saurophila	GCA_004024845.1	NCBI database	Broad Institute
Chiroptera	Yinpterochiroptera	Craseonycteridae	Craseonycteris thonglongyai	GCA_004027555.1	NCBI database	Broad Institute
Chiroptera	Yinpterochiroptera	Hipposideridae	Hipposideros galeritus	GCA_004027415.1	NCBI database	Broad Institute
Chiroptera	Yinpterochiroptera	Pteropodidae	Eidolon helvum	GCA_000465285.1	NCBI database	Parker et al. 2013
Chiroptera	Yinpterochiroptera	Pteropodidae	Hipposideros armiger	GCA_001890085.1	NCBI database	SKLEC & IECR
Chiroptera	Yinpterochiroptera	Pteropodidae	Macroglossus sobrinus	GCA_004027375.1	NCBI database	Broad Institute
Chiroptera	Yinpterochiroptera	Pteropodidae	Pteropus alecto	GCA_000325575.1	NCBI database	Broad Institute
Chiroptera	Yinpterochiroptera	Pteropodidae	Pteropus giganteus	GCA_902729225.1	NCBI database	CIRI-Inserm-U1111
Chiroptera	Yinpterochiroptera	Pteropodidae	Pteropus vampyrus	GCA_000151845.2	NCBI database	Broad Institute
Chiroptera	Yinpterochiroptera	Rhinolophidae	Rhinolophus ferrumequinum	GCA_004115265.3	NCBI database	Jebb et al. 2020
Chiroptera	Yinpterochiroptera	Rhinolophidae	Rhinolophus sinicus	GCA_001888835.1	NCBI database	Dong et al. 2017
Chiroptera	Yinpterochiroptera	Pteropodidae	Rousettus aegyptiacus	GCA_014176215.1	NCBI database	Jebb et al. 2020
