# Supplementary material for: Unraveling genomic features and phylogenomics through the analysis of three Mexican endemic Myotis genomes
Source: PeerJ. 2024 Jul 8;12:e17651. doi: 10.7717/peerj.17651 (PMC11238727; doi:10.7717/peerj.17651)
Supplement: Supplemental Information 3 [file peerj-12-17651-s003.docx]

**Unraveling genomic features and phylogenomics through the analysis of three Mexican endemic *Myotis* genomes**

Edgar G. Gutiérrez1, Jesús E. Maldonado2, Gabriela Castellanos-Morales3, Luis E. Eguiarte4, Norberto Martínez-Méndez1 and Jorge Ortega1*

1Laboratorio de Bioconservación y Manejo, Posgrado en Ciencias Químicobiológicas, Departamento de Zoología, Escuela Nacional de Ciencias Biológicas, Instituto Politécnico Nacional, Ciudad de México, Mexico.

2Center for Conservation Genomics, Smithsonian’s National Zoo and Conservation Biology Institute, Washington, DC, United States of America.

3Departamento de Conservación de la Biodiversidad, El Colegio de la Frontera Sur, Unidad Villahermosa (ECOSUR-Villahermosa), Villahermosa, Tabasco, Mexico

4Departamento de Ecología Evolutiva, Instituto de Ecología, Universidad Nacional Autónoma de México, Ciudad de México, Mexico.

Corresponding author:

Jorge Ortega

E-mail: artibeus2@aol.com

| **Adapter** | **Sequence** |
| --- | --- |
| > 5'_Adapter: | AGATCGGAAGAGCGTCGTGTAGGGAAAGAGTGTAGATCTCGGTGGTCGCCGTATCATT |
| >3'_Adapter: | GATCGGAAGAGCACACGTCTGAACTCCAGTCACGGATGACTATCTCGTATGCCGTCTTCTGCTTG |

**Table S1.** **Adapter sequences used in sequencing through the Illumina Novaseq 6000 platform.**

**Table S2. Assembly statistics resulting from the genome assemblies obtained with de novo approach in MaSuRCA of each *Myotis* species analyzed.**

| **Statistics** | ***M. vivesi*** | ***M. planiceps*** | ***M. findleyi*** |
| --- | --- | --- | --- |
| **# scaffolds** | 149,140 | 456,935 | 155,779 |
| **# scaffolds (>= 1000 bp)** | 136,416 | 354,774 | 139,268 |
| **# scaffolds (>= 5000 bp)** | 96,357 | 118,977 | 91,978 |
| **# scaffolds (>= 10000 bp)** | 64,916 | 43,736 | 60,766 |
| **# scaffolds (>= 25000 bp)** | 22,099 | 3,630 | 21,788 |
| **# scaffolds (>= 50000 bp)** | 4,473 | 105 | 5,257 |
| **Largest contig (bp)** | 189,978 | 106,939 | 224,674 |
| **Total length (Gbp)** | 1.94 | 1.87 | 1.93 |
| **N50 (Mb)** | 23,188 | 7,378 | 24,338 |
| **N90 (Mb)** | 6,686 | 1,777 | 6,220 |
| **L50** | 25,033 | 72,144 | 22,745 |
| **L90** | 84,037 | 270,266 | 82,635 |
| **GC (%)** | 42.70 | 41.98 | 42.79 |

**Table S4.** **Assembly statistics resulting from the genome assemblies obtained with MaSuRCA, after scaffolding and gap-filling in each of the *Myotis* species analyzed.**

| **Statistics** | ***M. vivesi*** | ***M. planiceps*** | ***M. findleyi*** |
| --- | --- | --- | --- |
| **# scaffolds** | 58,658 | 256,303 | 48,382 |
| **# scaffolds (>= 1000 bp)** | 44,985 | 154,381 | 30,889 |
| **# scaffolds (>= 5000 bp)** | 12,071 | 10,156 | 7,642 |
| **# scaffolds (>= 10000 bp)** | 5,024 | 1,171 | 4,288 |
| **# scaffolds (>= 25000 bp)** | 1,010 | 46 | 1,266 |
| **# scaffolds (>= 50000 bp)** | 142 | 29 | 280 |
| **Largest scaffold (Mb)** | 233.3 | 212.9 | 233.9 |
| **Total length (Gb)** | 2.06 | 2.08 | 2.05 |
| **N50 (Mb)** | 91.8 | 83.2 | 92.5 |
| **N90 (Mb)** | 29,765 | 2,125 | 17,114,864 |
| **L50** | 7 | 9 | 7 |
| **L90** | 682 | 61,948 | 22 |
| **GC (%)** | 42.72 | 42.50 | 42.91 |

**Table S5.** **Number of predicted genes in the three genomes of Mexican endemic *Myotis* species functionally annotated using indicated databases (column 1).**

|  | ***M. findleyi*** | ***M. vivesi*** | ***M. planiceps*** |
| --- | --- | --- | --- |
| **Genes** | 21,394 | 23,851 | 23,444 |
| **InterProScan** | 18,439 | 22,351 | 22,229 |
| **UniProt/Swiss-Prot** | 19,663 | 21,754 | 21,327 |
| **KEGG** | 9,546 | 11,868 | 10,719 |

**Table S6. Statistics of the result of grouping of orthologous genes with Orthofinder, using a total of six species of the genus *Myotis*.** Three species correspond to the genomes of Mexican endemic *Myotis* and another three to *Myotis* available in the NCBI database.

| Number of species | 8 |
| --- | --- |
| Number of genes | 179,639 |
| Number of genes in orthogroups | 170,943 |
| Number of unassigned genes | 8,696 |
| Percentage of genes in orthogroups | 95.2% |
| Percentage of unassigned genes | 4.8% |
| Number of orthogroups | 20,820 |
| Number of species-specific orthogroups | 324 |
| Percentage of genes in species-specific orthogroups | 0.5% |
| Mean orthogroup size | 8.2 |
| Median orthogroup size | 8 |
| G50 (assigned genes) | 8 |
| G50 (all genes) | 8 |
| O50 (assigned genes) | 6,197 |
| O50 (all genes) | 6,740 |
| Number of orthogroups with all species present | 9,398 |
| Number of single-copy orthogroups | 4,789 |
